# Supplementary material for: Novel immune cell infiltration-related biomarkers in atherosclerosis diagnosis
Source: PeerJ. 2023 May 1;11:e15341. doi: 10.7717/peerj.15341 (PMC10158768; doi:10.7717/peerj.15341)
Supplement: Supplemental Information 1 — The raw CT values and processed result of RT-qPCR. [file peerj-11-15341-s001.xlsx]

## Sheet: Sheet1
Raw CT value
		MMP9			CHI3L1			HMOX1			GAPDH
NC+ox-LDL	Repeat 1	15.919	15.8479	16.0149	18.0887	17.8774	17.8277	17.8381	17.7091	17.9941	31.7861	30.7989	30.921
	Repeat 2	15.9971	16.0907	16.0514	17.9751	17.7456	17.8774	18.2531	17.7706	18.037	31.8245	31.7956	31.2954
	Repeat 3	15.8114	15.9925	16.0464	17.624	17.756	17.7577	17.884	17.793	18.0596	31.4803	30.8105	31.0303
NC	Repeat 1	15.8445	15.8896	15.9277	17.6342	17.8314	17.728	17.9809	17.7874	17.8031	30.14	30.3284	31.2493
	Repeat 2	16.0907	16.1188	16.0298	18.1503	18.0319	18.2618	18.3301	18.3484	18.1554	30.1328	29.8679	30.0901
	Repeat 3	15.9242	16.0857	16.0761	17.9866	17.7851	17.9174	18.3454	18.1764	18.3201	30.1631	30.86	30.4048
After processing
MMP9			CHI3L1			HMOX1
NC	NC+ox-LDL		NC	NC+ox-LDL		NC	NC+ox-LDL
1.2897	1.85143		1.41806	1.56429		1.29298	2.15774
0.746647	2.42905		0.680915	2.34392		0.696945	2.24129
1.14133	1.91141		1.0388	2.06857		0.93922	2.00283
1.25004	1.94487		1.23696	1.81109		1.47858	2.35958
0.732251	2.27644		0.739148	2.74819		0.688185	3.13155
1.02049	1.68586		1.19457	1.88762		1.05593	2.13313
1.21746	1.73237		1.3288	1.87453		1.4625	1.93662
0.778858	2.33932		0.630282	2.50814		0.786656	2.60346
1.02726	1.62403		1.08989	1.88543		0.955822	1.7733
